# Supplementary material
Source: publisher figshare collection journal article supplement (https://acs.figshare.com/ndownloader/files/6990197)
Supplement: Supplementary file 1 [file 6990197]

# Quantitative Study on $\beta$ -Phase Heredity Based on Poly(9,9-dioctylfluorene) from Solutions to Films and the Effect on Hole Mobility

*Zeming Bai, Yang Liu, Tao Li, Xiaona Li, Bin Liu, Bo Liu, Dan Lu\**

State Key Laboratory of Supramolecular Structure and Materials, College of Chemistry, Jilin University,

2699 Qianjin Avenue, Changchun, 130012, China

Tel: +86 431 85167057, Fax: +86 431 85193421;

\*E-mail: lud@jlu.edu.cn

# Supporting Information

## 1. The calculation method of the proportion of $\beta$ -conformation in PFO solution<sup>1</sup>

The proportion of  $\beta$ -conformation in PFO solution can be calculated according to Lambert-Beer's law (Eq. S2), where  $c_\alpha$  and  $c_\beta$  are the concentrations of  $\alpha$ -conformation and  $\beta$ -conformation, respectively,  $A$  (obtained from experiments) is the absorbency and  $\varepsilon$  is the absorption coefficient. In UV-vis absorption spectra of PFO solutions, it is difficult to obtain the  $\varepsilon$  for  $\alpha$ -conformation and  $\beta$ -conformation. Thus we used the method of molecular simulation to the absorption spectra to calculate the proportion of  $\varepsilon_\beta/\varepsilon_\alpha$ .<sup>2</sup>

$$\alpha\% + \beta\% = 1 \quad (S1)$$

$$\beta\% = \frac{c_\beta}{c_\beta + c_\alpha} = \frac{A_\beta \times \varepsilon_\alpha}{A_\beta \times \varepsilon_\alpha + A_\alpha \times \varepsilon_\beta} \quad (S2)$$

By defining six monomer units as the conjugation length,<sup>3</sup> we optimized the symmetry geometries of PFO chains for the approximate calculation of  $\varepsilon$  using Density Functional Theory (DFT).<sup>4</sup> To calculate the oscillator strengths ( $f$ ), Time-Dependent Density Functional Theory (TD-DFT) was used,<sup>5</sup> as this method has been found to give reliable results.<sup>6</sup> DFT and TD-DFT are both with a B3LYP hybrid functional basis set level of 6-31G\*.<sup>7</sup> All calculations were performed using the Gaussian 03 package.<sup>6</sup> The oscillator strengths ( $f$ ) of the two conformations are 4.46 for  $\alpha$ -conformation at 386 nm and 4.83 for  $\beta$ -conformation at 437 nm. Thus, the proportion of  $\varepsilon_\beta/\varepsilon_\alpha$  can be obtained from Eq. S3 and Eq. S4, where  $k$  is a constant and  $\nu$  is the vibration frequency of two conformations. We can calculate the proportion of  $\beta$ -conformation in each UV-vis absorption spectra of PFO solutions using Eq. S2 and Eq. S4.

$$f = k \int \varepsilon d\nu, \quad f \propto \varepsilon \quad (S3)$$

$$\frac{\varepsilon_{\beta}}{\varepsilon_{\alpha}} = \frac{f_{\beta}}{f_{\alpha}} = \frac{4.83}{4.46} = 1.08 \quad (\text{S4})$$

## REFERENCES

- (1) Huang, L.; Huang, X. N.; Sun, G. N.; Gu, C.; Lu D.; Ma, Y. G. Study of  $\beta$  phase and Chains Aggregation Degrees in Poly(9,9-dioctylfluorene) (PFO) Solution. *J. Phys. Chem. C* **2012**, *116*, 7993-7999.
- (2) Gu, C.; Tang, S.; Yang, B.; Liu, S. J.; Lv, Y.; Wang, H.; Yang, S. M.; Hanif, M.; Lu, D.; Shen, F. Z.; Ma, Y. G. Almost Completely Dedoped Electrochemically Deposited Luminescent Films Exhibiting Excellent LED Performance. *Electrochim. Acta* **2009**, *54*, 7006-7011.
- (3) Ng, M. F.; Sun, S. L.; Zhang, R. Q. A comparative study of optical properties of poly(9,9-dioctylfluorene) and poly(pp-phenylenevinylene) oligomers. *J. Appl. Phys.* **2005**, *97*, 103513-1-103513-6.
- (4) Hohenberg, P.; Kohn, W. Inhomogeneous Electron Gas[J]. *Phys. Rev. B* **1964**, *136*, 864-871.
- (5) Runge, E.; Gross, E. K. U. Density-Functional Theory for Time-Dependent Systems. *Phys. Rev. Lett.* **1984**, *52*, 997-1000.
- (6) Hirata, S.; Lee, T. J.; Gordon, M. H. Time-dependent density functional study on the electronic excitation energies of polycyclic aromatic hydrocarbon radical cations of naphthalene, anthracene, pyrene, and perylene. *J. Chem. Phys.* **1999**, *111*, 8904-8912.
- (7) Lee, C.; Yang, W.; Parr, R. G. Development of the Colle-Salvetti Correlation-Energy Formula into a Functional of the Electron Density. *Phys. Rev. B* **1988**, *37*, 785-789.

## 2. The fluorescence spectra of PFO with different $\beta$ -conformation in PFO contents

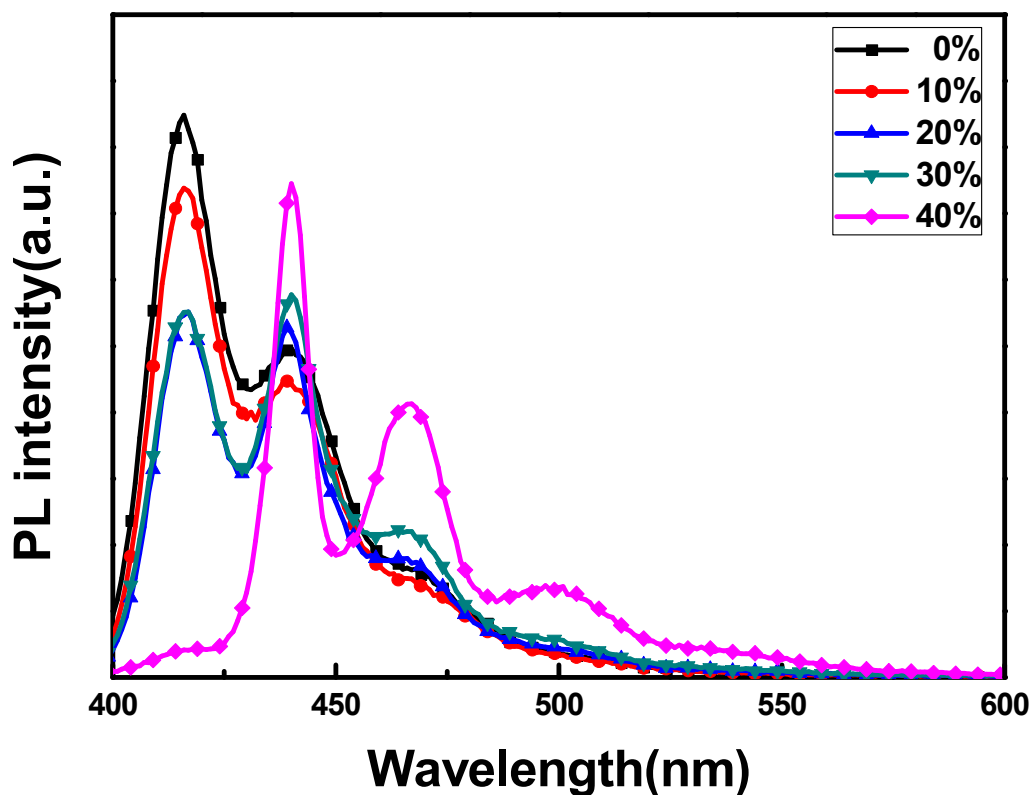

**Figure S1** fluorescence spectra of five PFO samples with different percent of ethanol (0% to 40%) spin-casting from original solution (10mg/ml)

From Fig.S1, it can be seen that the corresponding fluorescence spectra is well consistent with the UV-vis absorption spectra Fig.2 (a) and (b) in the  $\beta$  phase of PFO transfer from solutions to films. However, the fluorescence spectra of PFO is same no matter in solutions or films.

When the ethanol increased from 0% to 30%, a fluorescence self-absorption phenomenon has resulted in a decrease in the PL intensity in the range of 400nm to 450nm.( as the absorption peak of PFO is in the range of 300-500 nm).The change of peak intensity also means the polymer conformation changes.Nevertheless, the ethanol content exceeds 30%, the red shift of the PL spectrum occurred,

meanwhile, energy transfer occurs. The emission peak becomes 442, 464, 496 nm, these three are the emission peaks of the PFO  $\beta$  conformation. The predominantly chromophore that produces fluorescence emission is  $\beta$  conformation, 442 nm is the 0-0 emission peak, 464, 496 nm is the 0-1 and 0-2 emission peak, respectively. It is shown that the effective conjugated length of the PFO grows, and the energy decreases to form a more stable conformation, but also indirectly explain the  $\beta$ -conformation of the conjugate length growth and low energy stability.
